# Supplementary material for: The abscisic acid-responsive transcriptional regulatory module CsERF110–CsERF53 orchestrates citrus fruit coloration
Source: PubMed Central journal article supplement — Plant Commun. 2024 Aug 20;5(11):101065. doi: 10.1016/j.xplc.2024.101065 (PMC11589302; doi:10.1016/j.xplc.2024.101065), 2024-08-20
Supplement: mmc2.pdf [file mmc2.pdf]

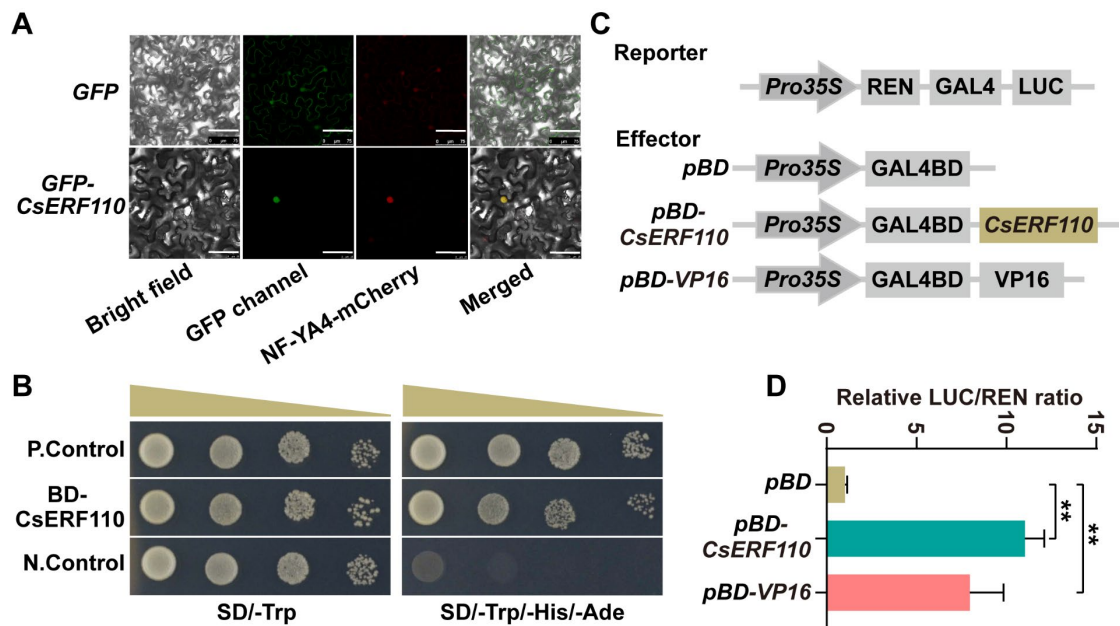

**Supplemental Figure 2. *CsERF110* is involved in ABA-induced citrus carotenoid accumulation as a nucleus-localized transcriptional activator.**

**(A)** Subcellular localization of *CsERF110* in *Nicotiana benthamiana* (*N. benthamiana*). *CsERF110*-GFP, GFP signal; NF-YA4-mCherry, RFP signal; Merged, combined GFP and RFP signals. Bright Field and white light were background colors. Bars = 75  $\mu$ m. **(B)** *CsERF110* transactivation activity assay. PGBKT7-53+PGADT7-RecT and empty vector PGBKT7 were used as positive control (P. Control) and negative control (N. Control), respectively. **(C)** and **(D)** Transcriptional activity analysis of *CsERF110* using a dual luciferase system. Empty pBD and pBD-VP16 served as the negative and positive controls, respectively. The luciferase activity was quantified as the transcriptional activity of *CsERF110*. The data were expressed mean  $\pm$  SD of at least three biological replicates. Statistically significant differences were determined by Student's t-test (\*,  $P < 0.05$ ; \*\*,  $P < 0.01$ ).

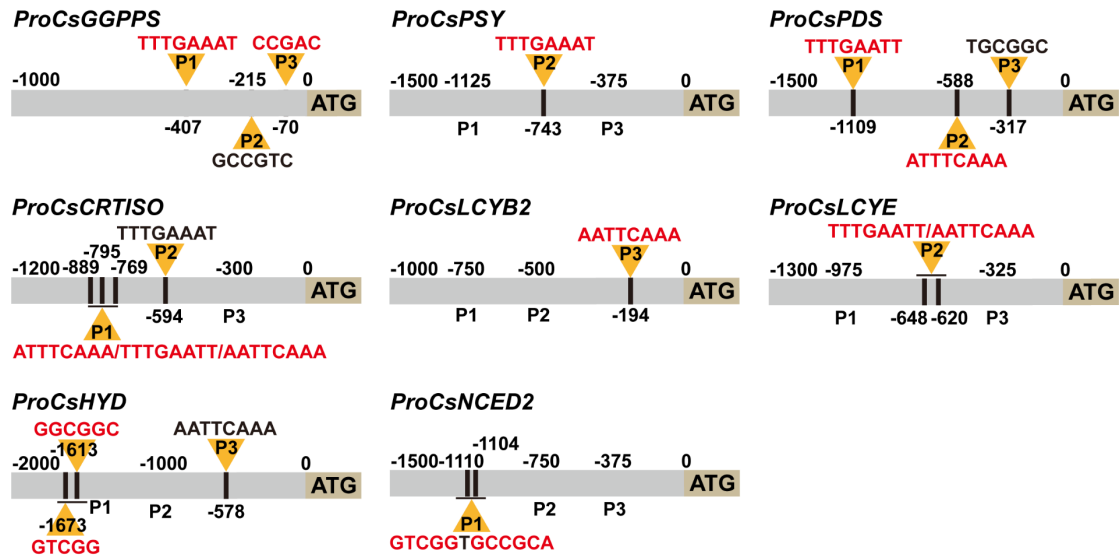

**Supplemental Figure 3. Schematic diagram of target gene promoters.**

Schematic diagram of target gene promoters (*CsGGPPS*, *CsPSY*, *CsPDS*, *CsCRTISO*, *CsLCYB2*, *CsLCYE*, *CsHYD*, and *CsNCED2*). These black lines represent putative *CsERF110* binding motif of these promoters.

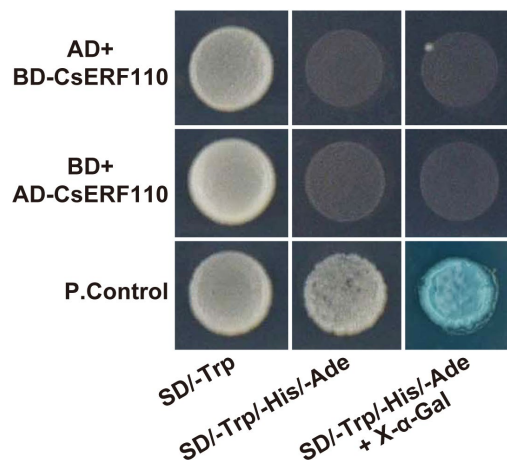

**Supplemental Figure 4. *CsERF110* has no transcriptional self-activation in yeast cells.**

Co-transformation of pGBKT7-p53 and pGADT7-RecT was used as a positive control (P. Control). Yeast grown in SD/-Trp/-Leu medium and SD/-Trp/-Leu/-His/-Ade medium is shown. The interaction is indicated by yeast growth and X- $\alpha$ -Gal staining.



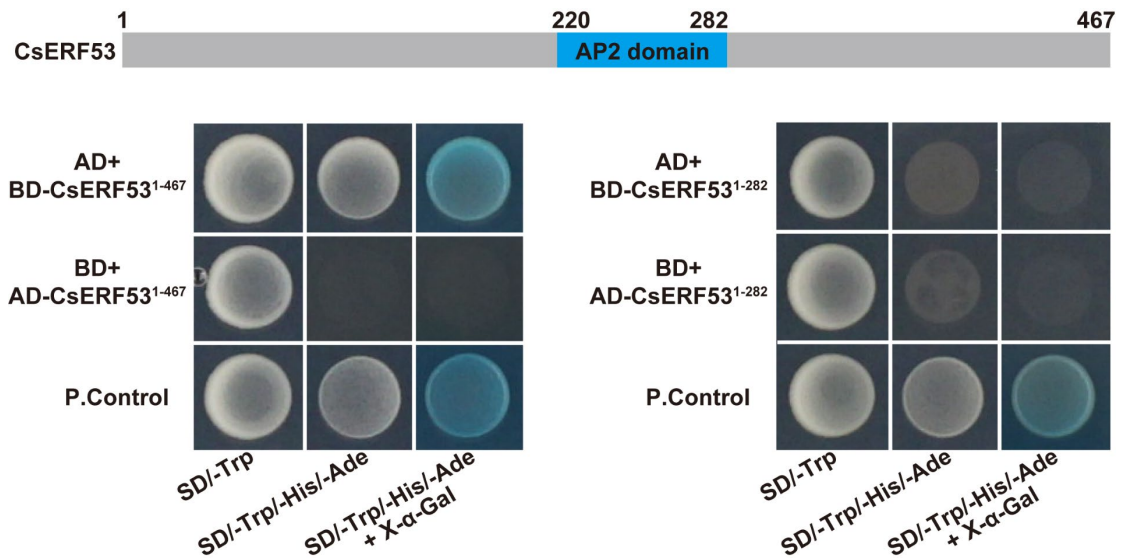

**Supplemental Figure 6. Analysis of CsERF53 transcriptional self-activation in yeast cells.**

Co-transformation of pGBKT7-p53 and pGADT7-RecT was used as a positive control (P. Control). Yeast grown in SD/-Trp/-Leu medium and SD/-Trp/-Leu/-His/-Ade medium is shown. The interaction is indicated by yeast growth and X- $\alpha$ -Gal staining.

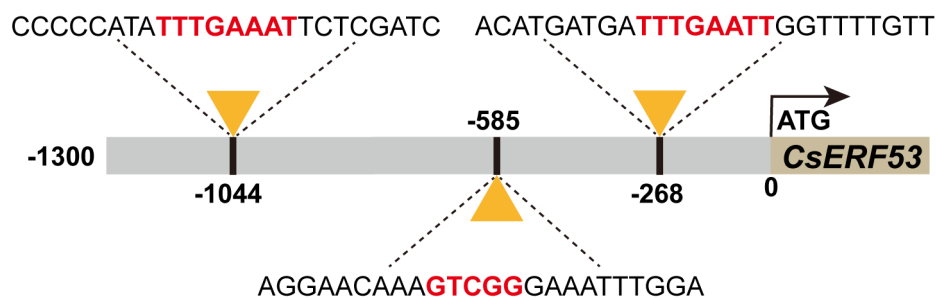

**Supplemental Figure 7. Schematic representation of potential binding elements of CsERF110 in the CsERF53 promoter.**

Yellow triangles represent the position of potential *cis*-acting elements of CsERF110 in the CsERF53 promoter, and red letters represent the sequences of the potential *cis*-elements of CsERF110.

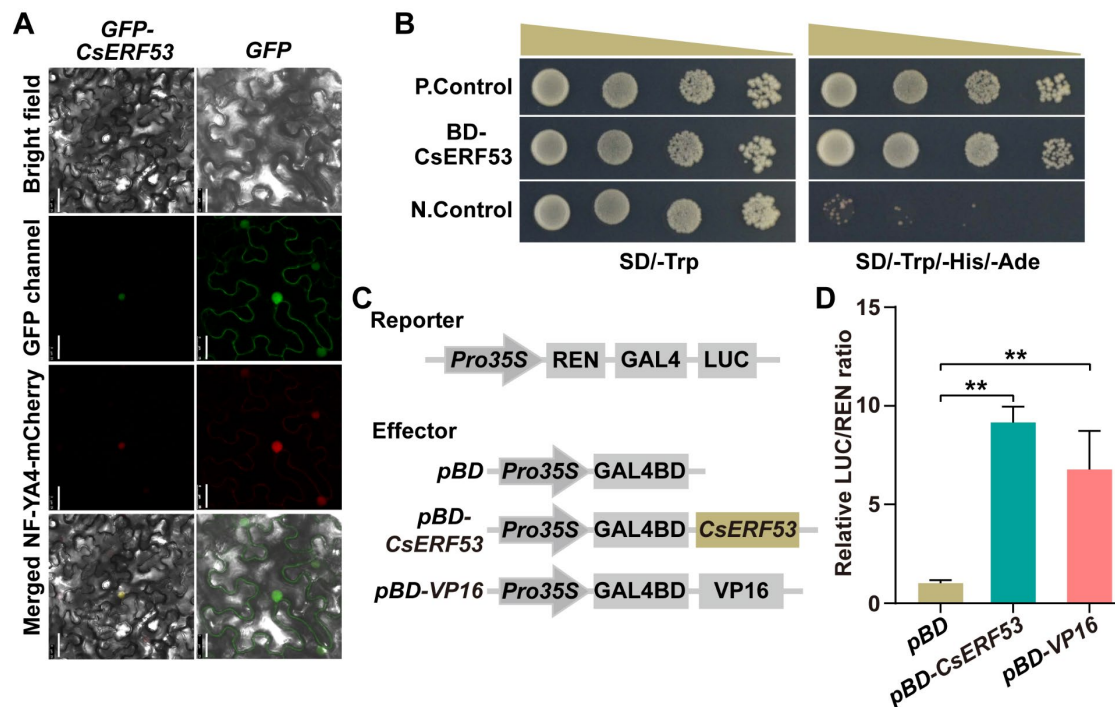

**Supplemental Figure 8. *CsERF53* is involved in ABA-promoted citrus carotenoid accumulation as a nucleus-localized transcriptional activator.**

**(A)** Subcellular localization of *CsERF53* in *N. benthamiana* leaves. *CsERF53*-GFP, GFP signal; NF-YA4-mCherry, RFP signal; Merged, combined GFP and RFP signals. Bright Field and white light were background colors. Images on the right, bars = 75  $\mu\text{m}$ ; Images on the left, bars = 50  $\mu\text{m}$ . **(B)** *CsERF53* transactivation activity assay. PGBKT7-53+PGADT7-RecT and empty vector PGBKT7 were used as positive control (P. Control) and negative control (N. Control), respectively. **(C)** and **(D)** Transcriptional activity analysis of *CsERF53* using a dual luciferase system. Empty pBD and pBD-VP16 served as the negative and positive controls, respectively. The luciferase activity was quantified as the transcriptional activity of *CsERF53*. The data were expressed mean  $\pm$  SD of at least three biological replicates. Statistically significant differences were determined by Student's t-test (\*,  $P < 0.05$ ; \*\*,  $P < 0.01$ ).



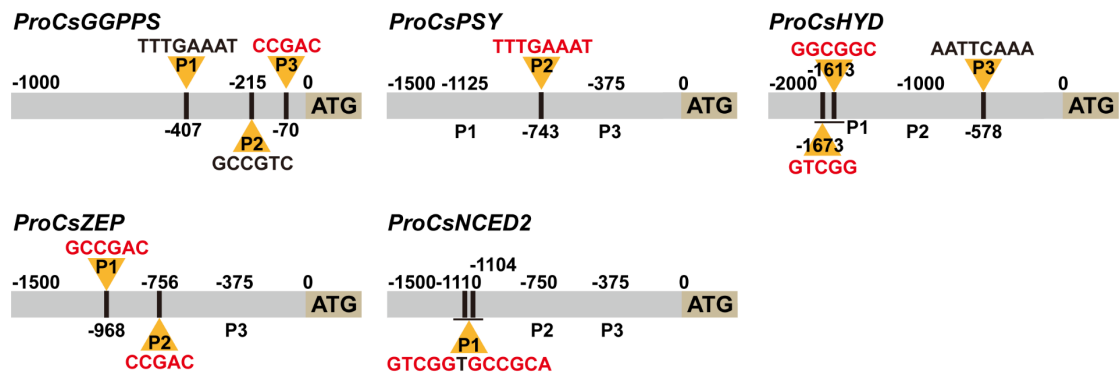

**Supplemental Figure 9. Schematic diagram of target gene promoters.**

Schematic diagram of target gene promoters (*CsGGPPS*, *CsPSY*, *CsHYD*, and *CsNCED2*). These black lines represent putative *CsERF53* binding motif of these promoters.

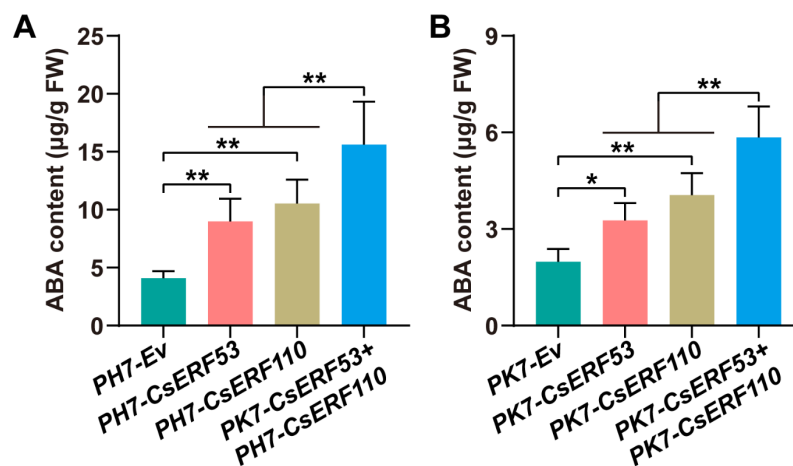

**Supplemental Figure 10. Overexpression of *CsERF53* and *CsERF110* significantly promotes ABA accumulation.**

The content of ABA in stably transformed citrus calli (**A**) and transiently injected citrus fruit (**B**). Data represent means  $\pm$  SD of three biological replicates. Asterisks indicate statistically significant differences determined by Student's *t*-test (\*,  $0.01 < P < 0.05$ ; \*\*,  $P < 0.01$ ; n.s., no significant difference).
